# Supplementary figures and images for: Prediction of a two-dimensional high Curie temperature Weyl nodal line kagome semimetal
Source: Royal Society of Chemistry journal article supplement (doi:10.1039/d3cp03762b), 2023-12-18

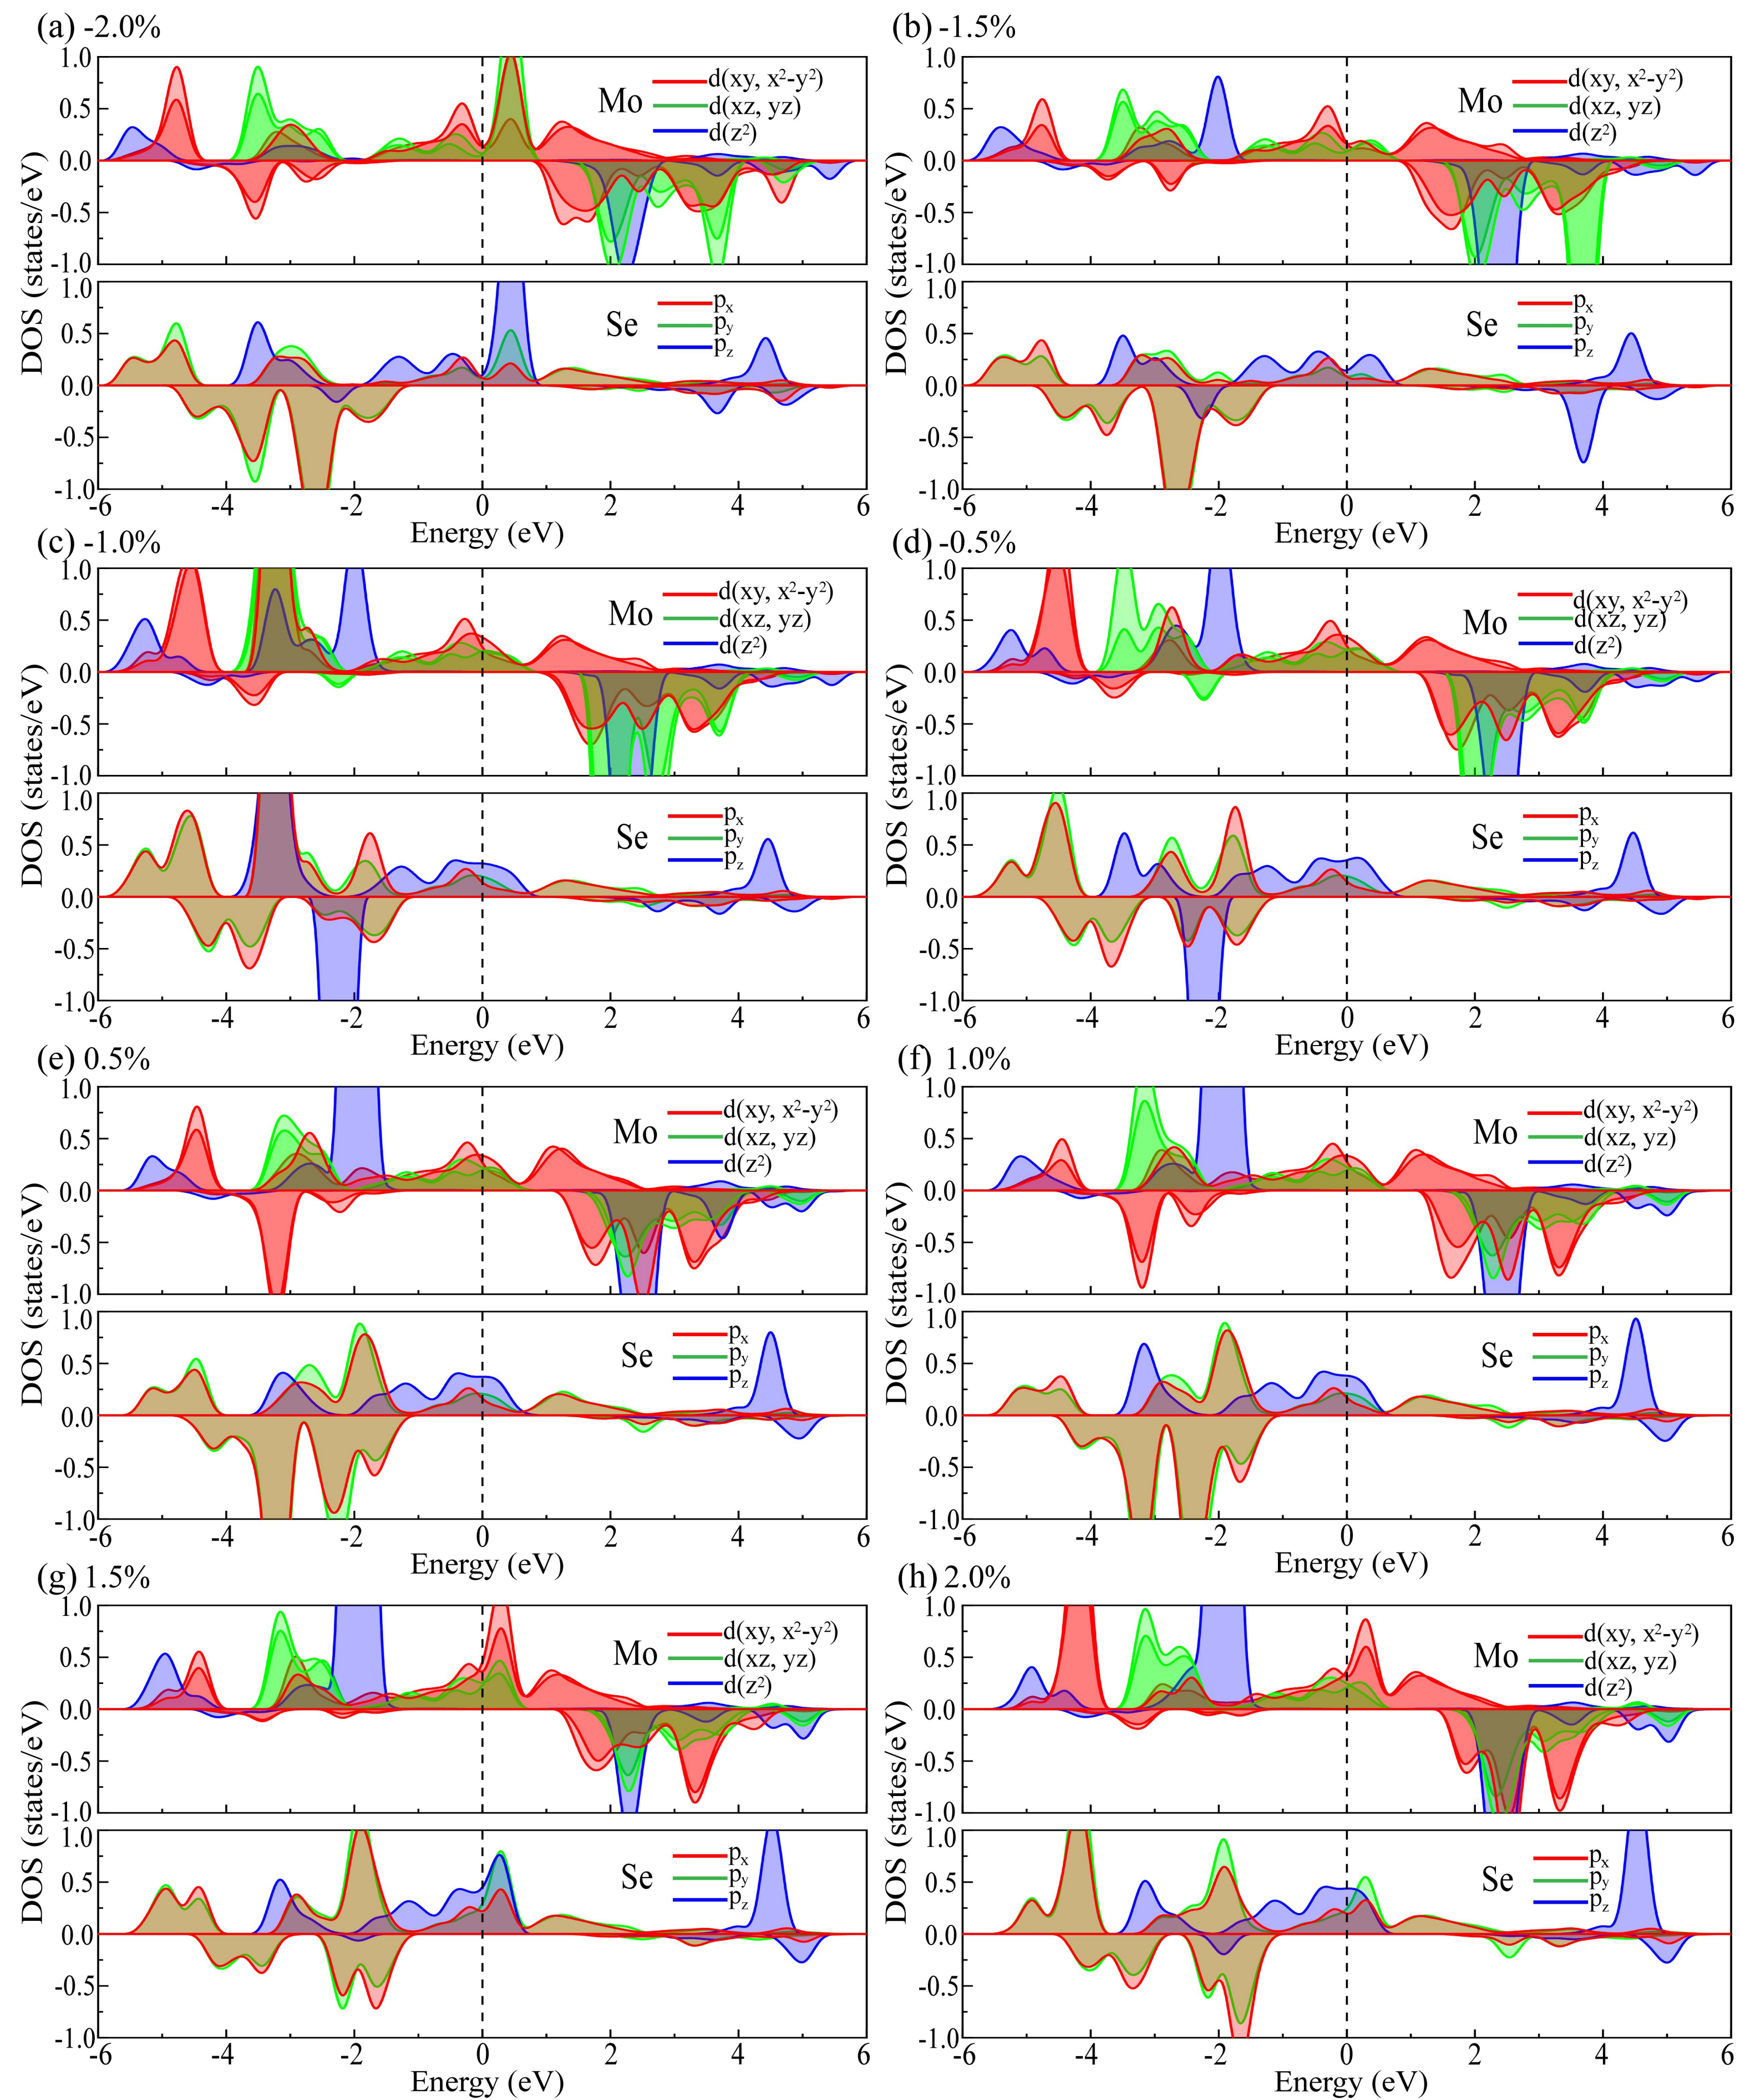

Supplement: d3cp03762b10.pdf [file d3cp03762b10.pdf]

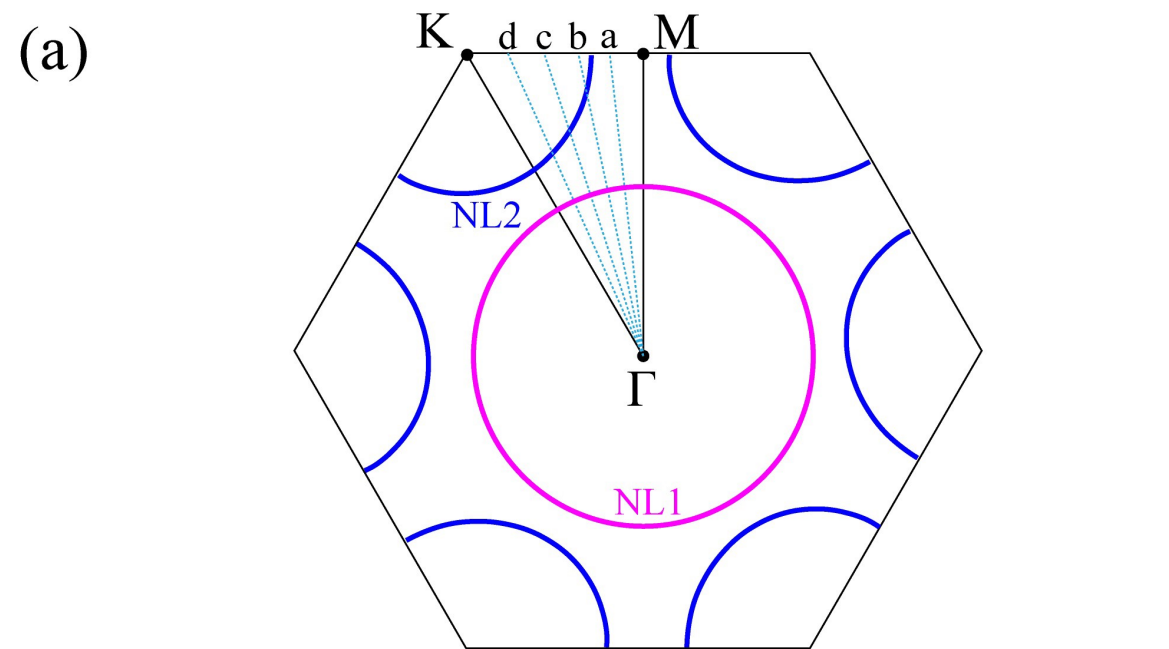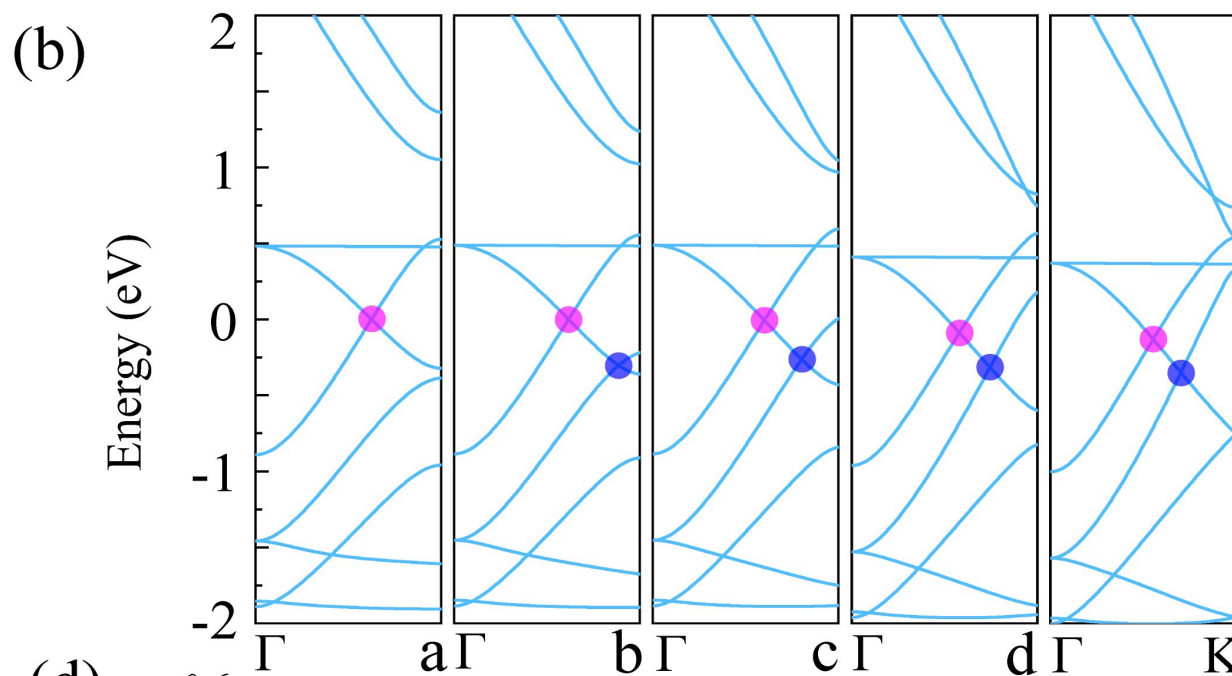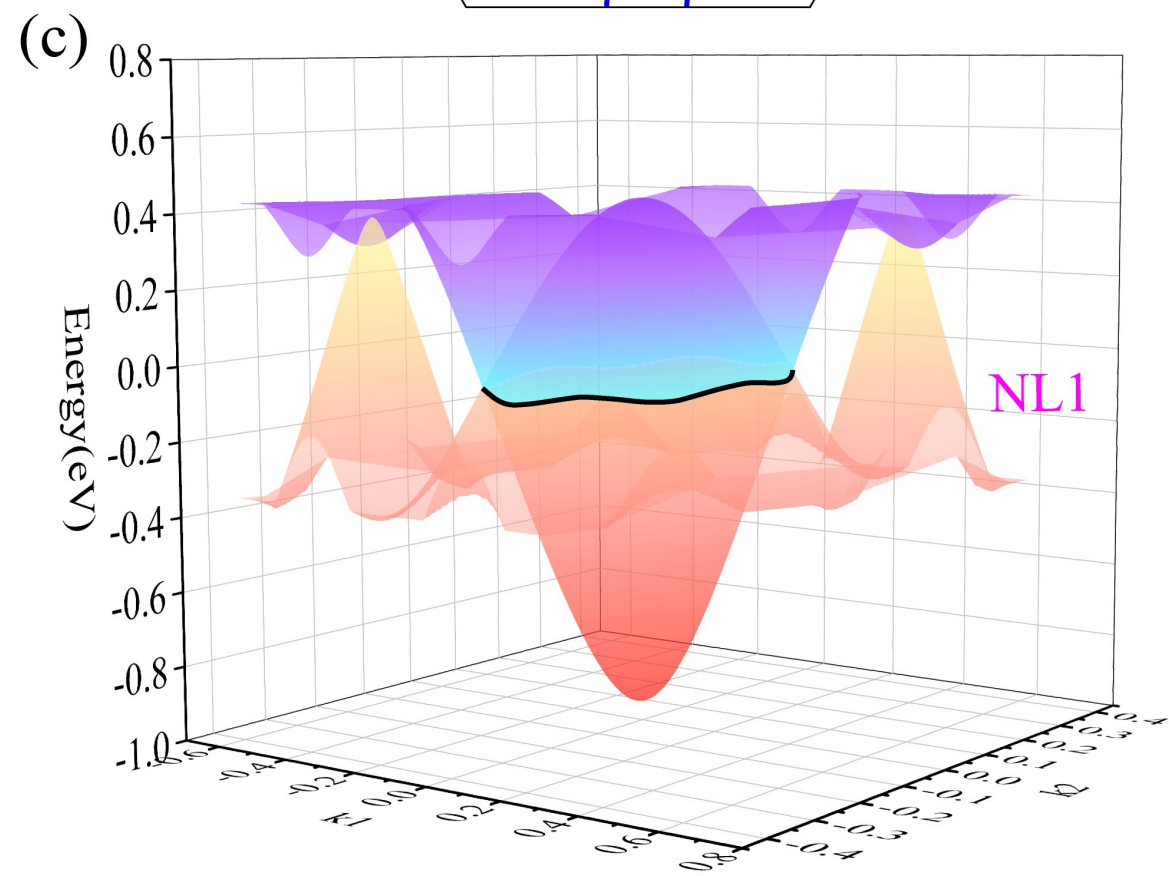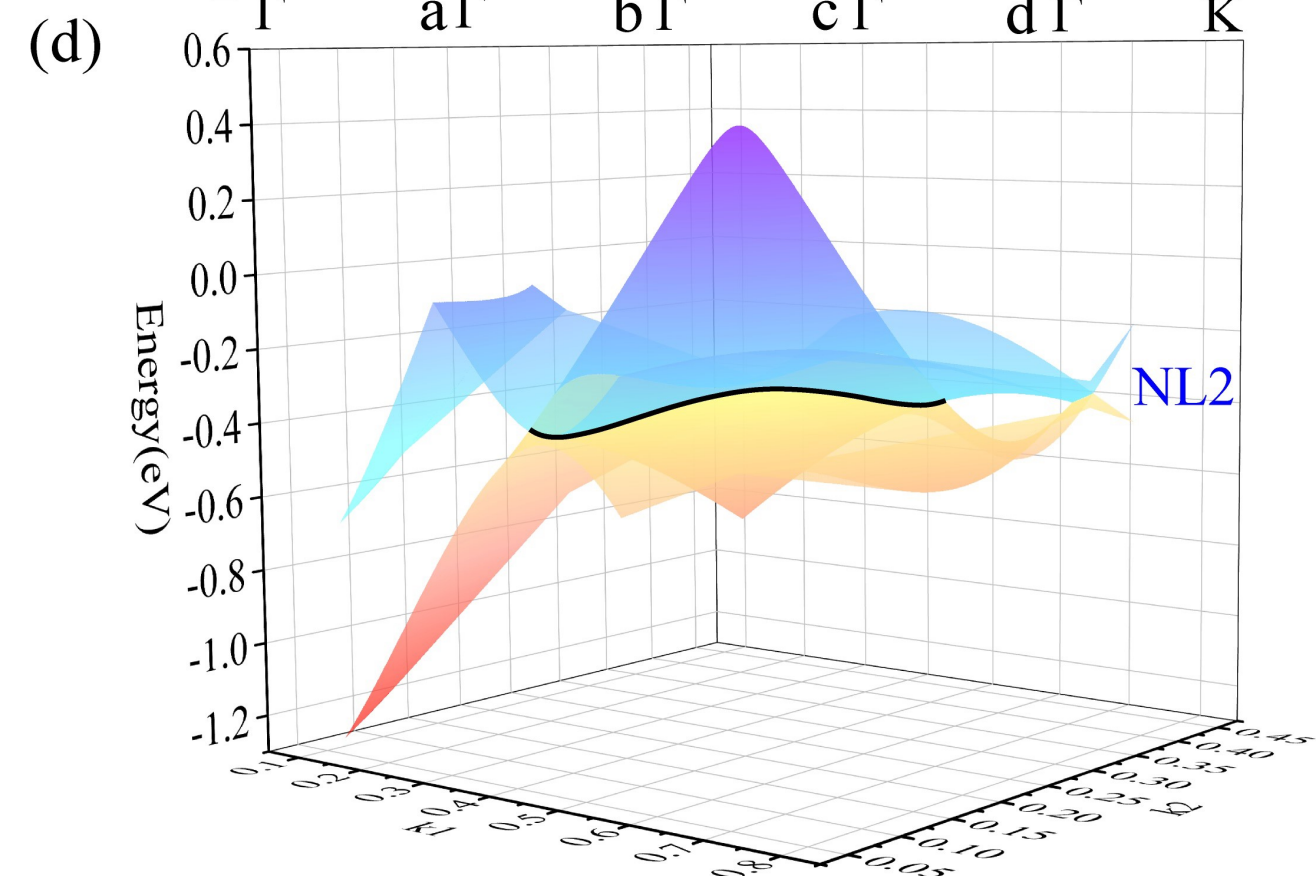

Supplement: d3cp03762b3.pdf [file d3cp03762b3.pdf]

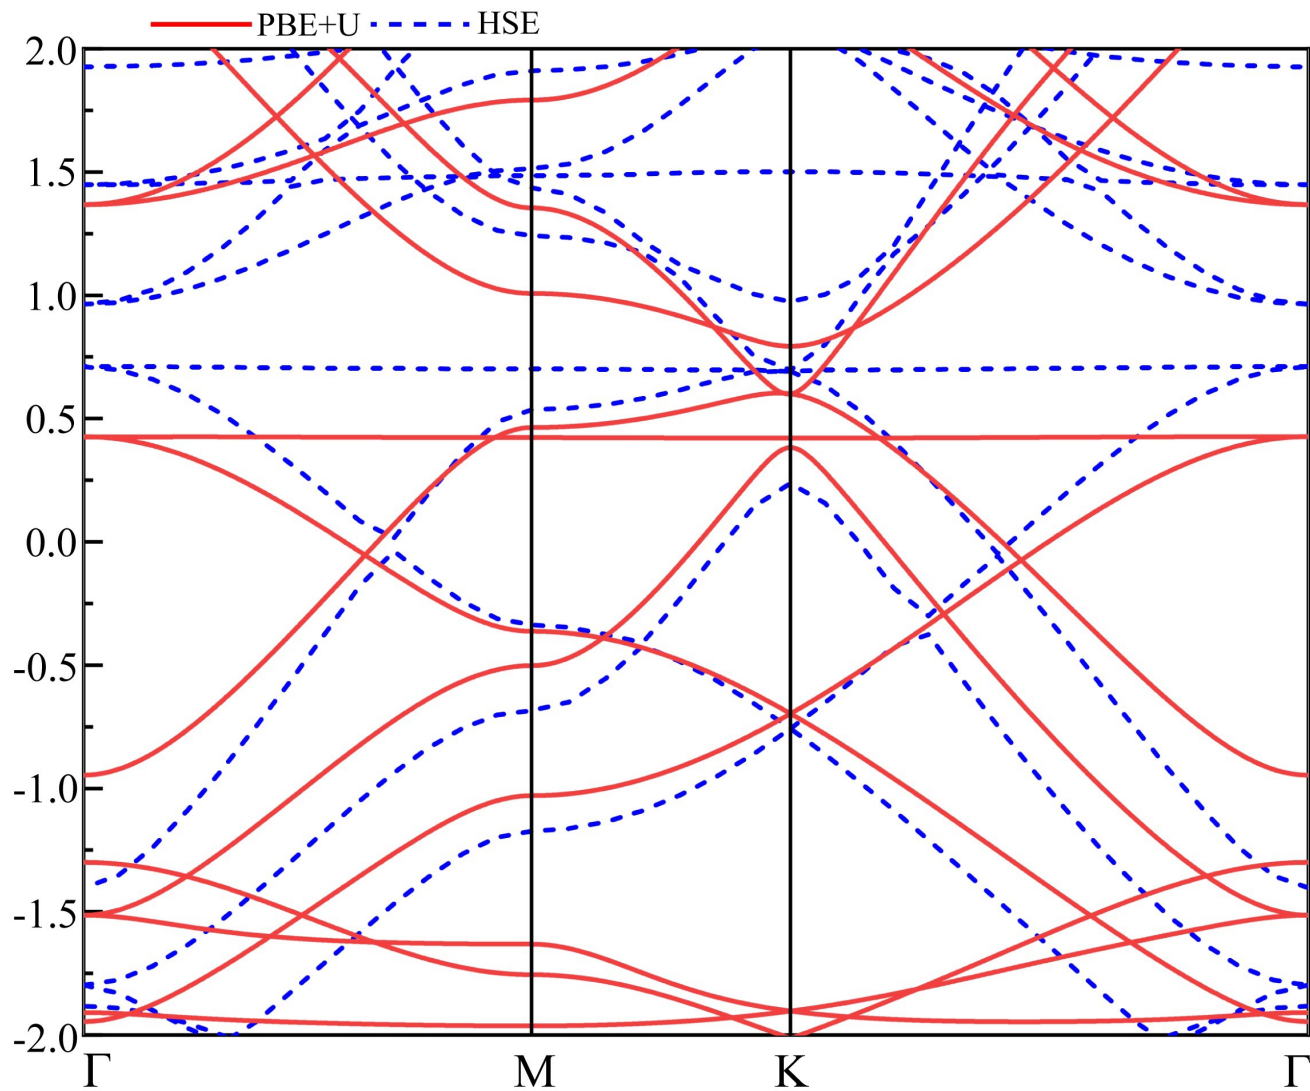

Supplement: d3cp03762b4.pdf [file d3cp03762b4.pdf]

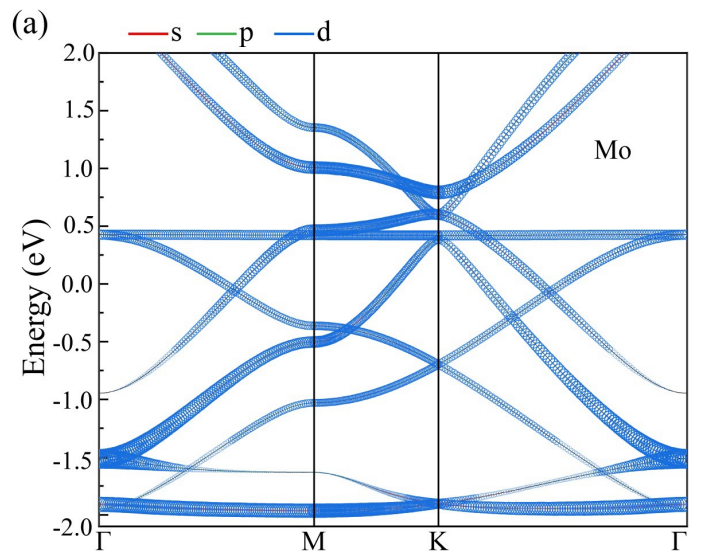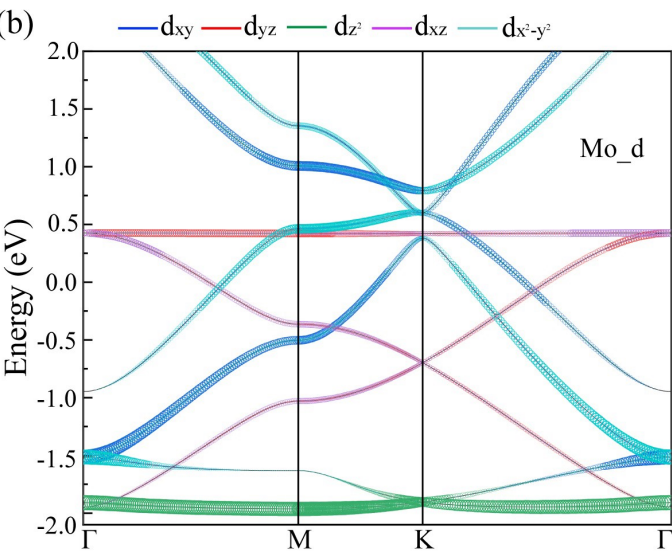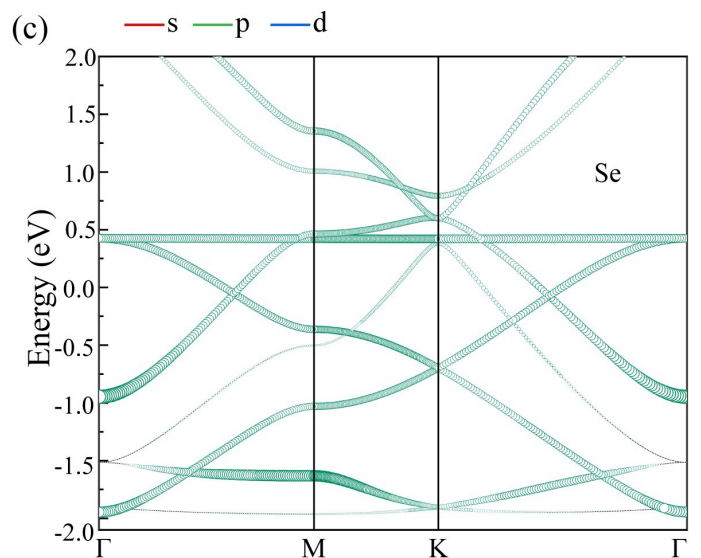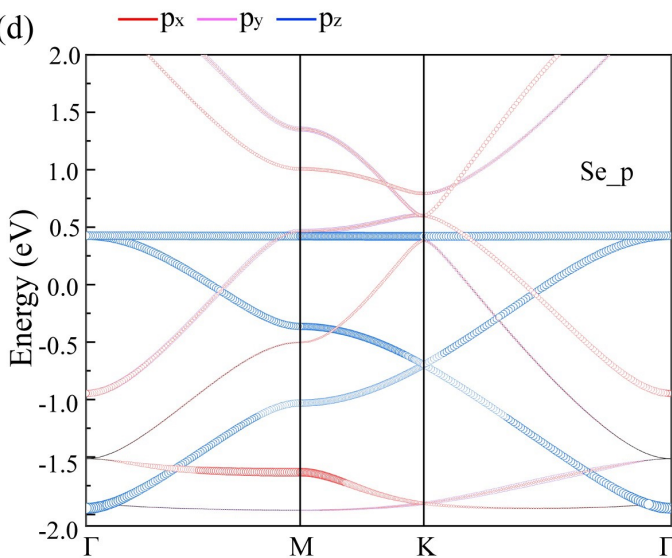

Supplement: d3cp03762b5.pdf [file d3cp03762b5.pdf]

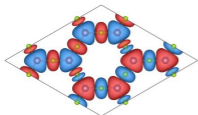

AFM1

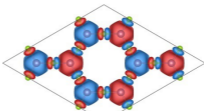

AFM2

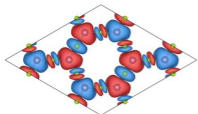

AFM3

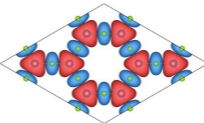

FM

Supplement: d3cp03762b6.pdf [file d3cp03762b6.pdf]

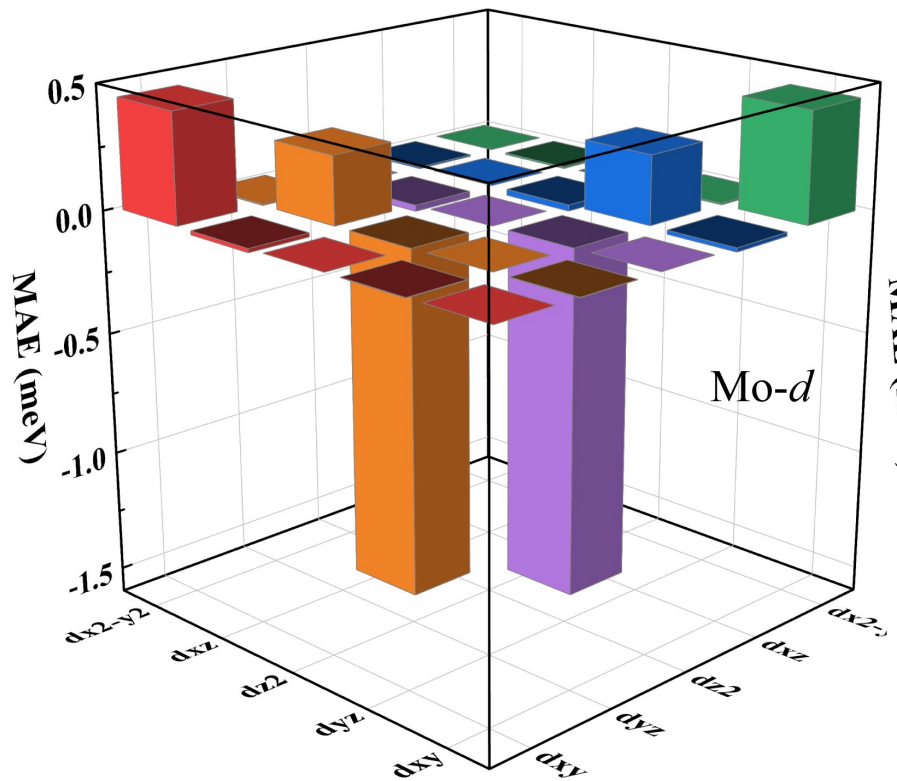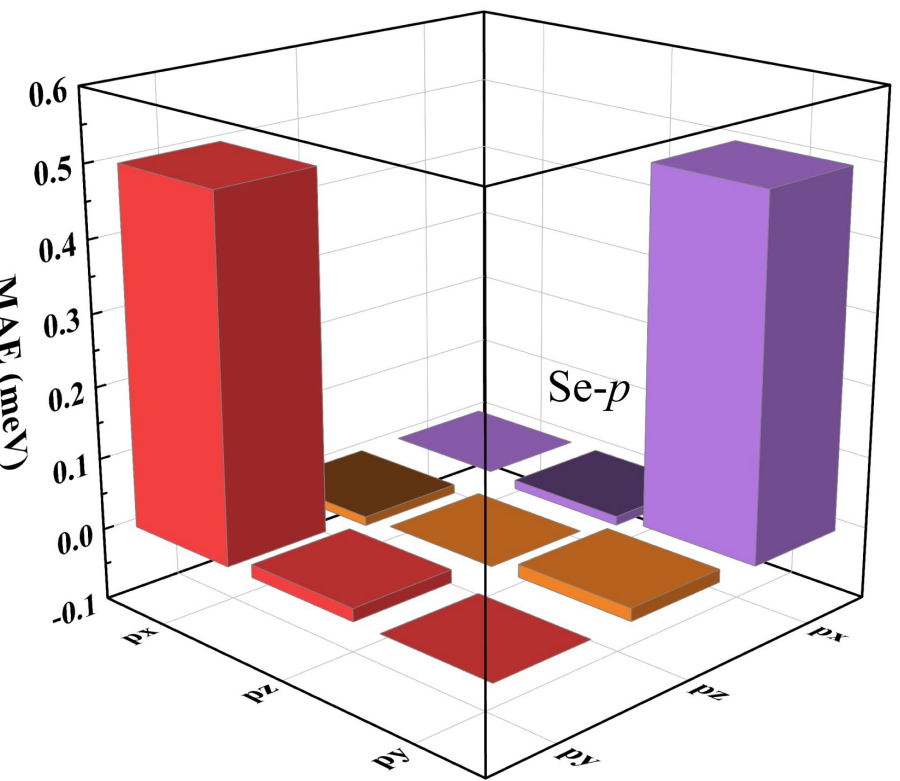

Supplement: d3cp03762b7.pdf [file d3cp03762b7.pdf]

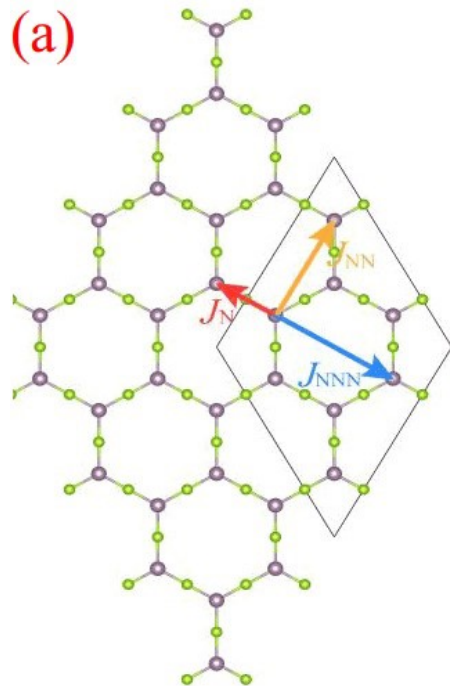

(b)

|                        | N     | NN    | NNN   |
|------------------------|-------|-------|-------|
| $J_{xx}(J_{yy})$ (meV) | 39.40 | 10.74 | 0.92  |
| $J_{zz}$ (meV)         | 39.07 | 10.67 | 0.87  |
| $\lambda$ (meV)        | -0.33 | -0.08 | -0.05 |

$A = 1.06$  meV

Supplement: d3cp03762b8.pdf [file d3cp03762b8.pdf]

(a) -2.0%

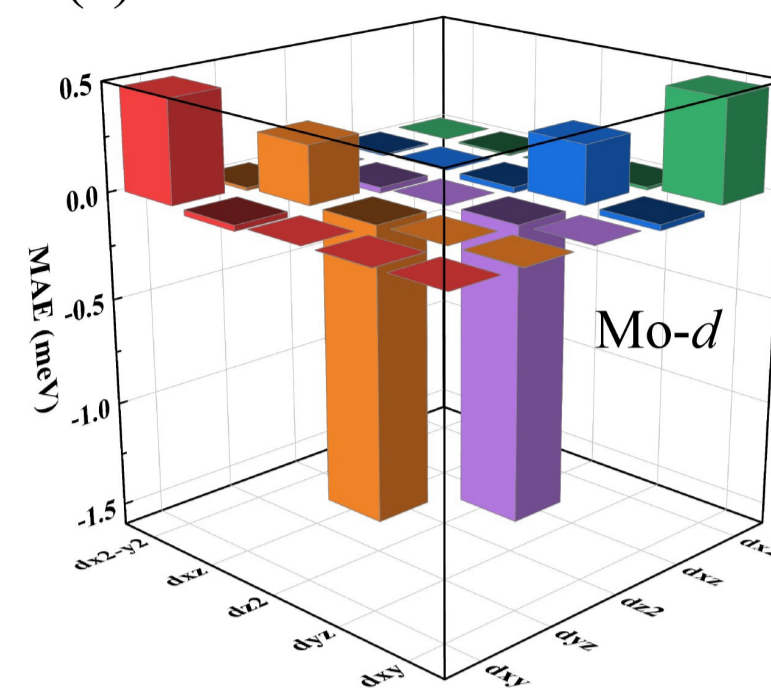

(b) -1.5%

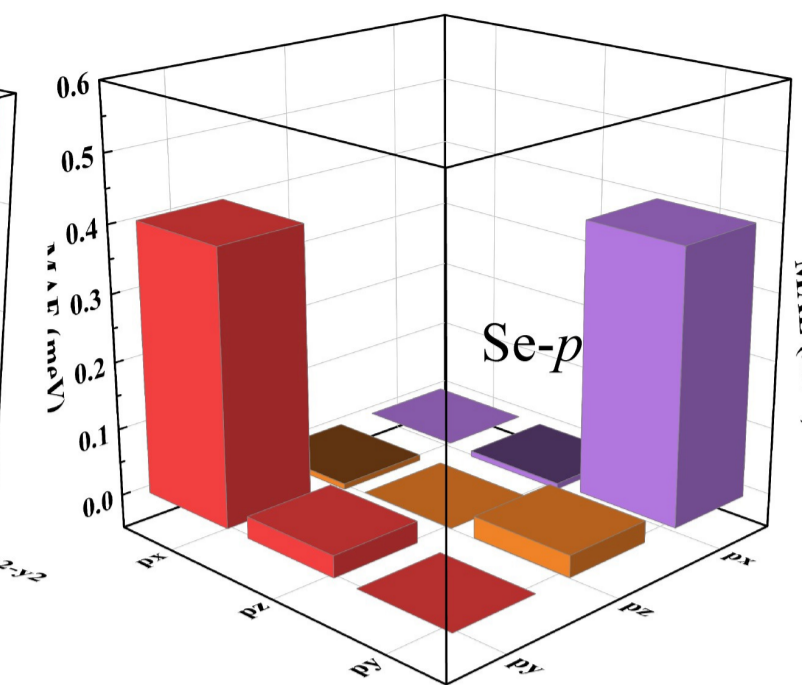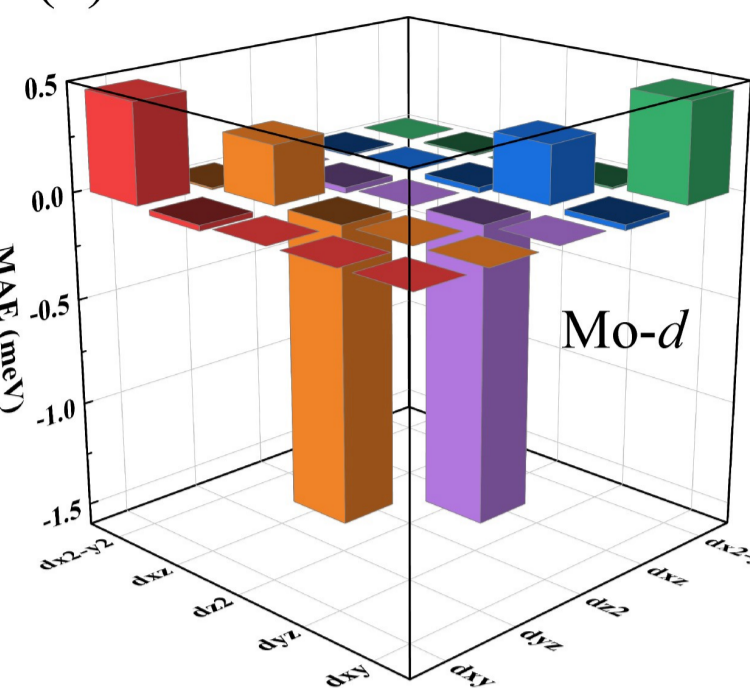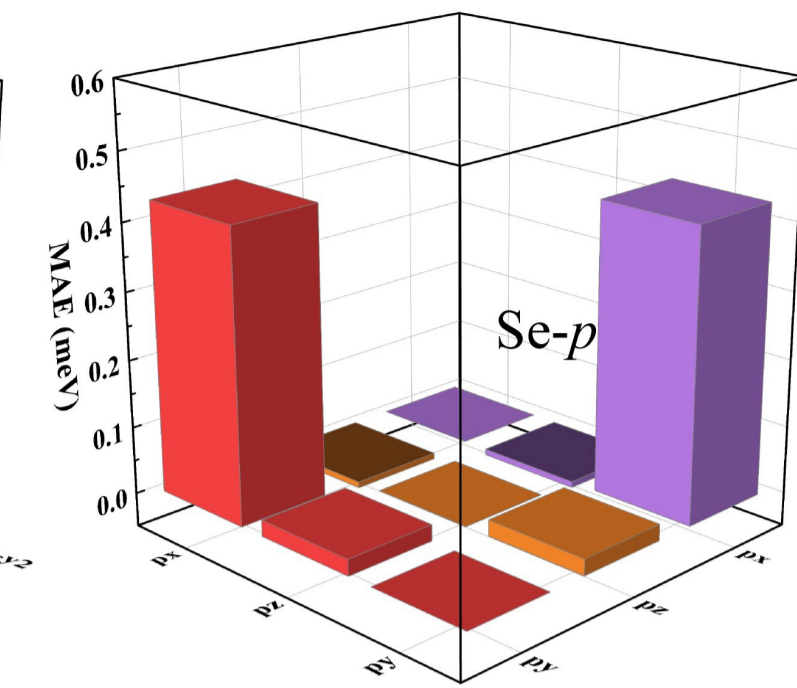

(c) -1.0%

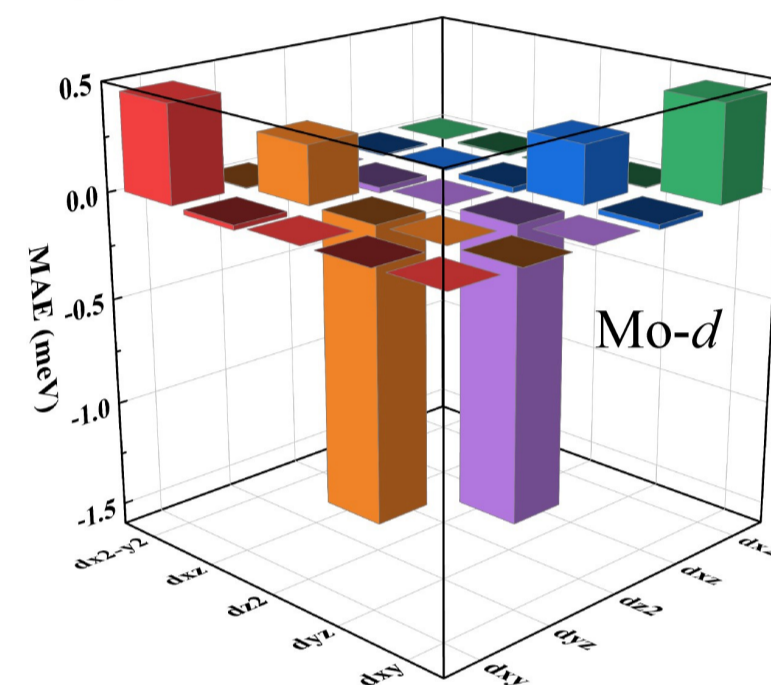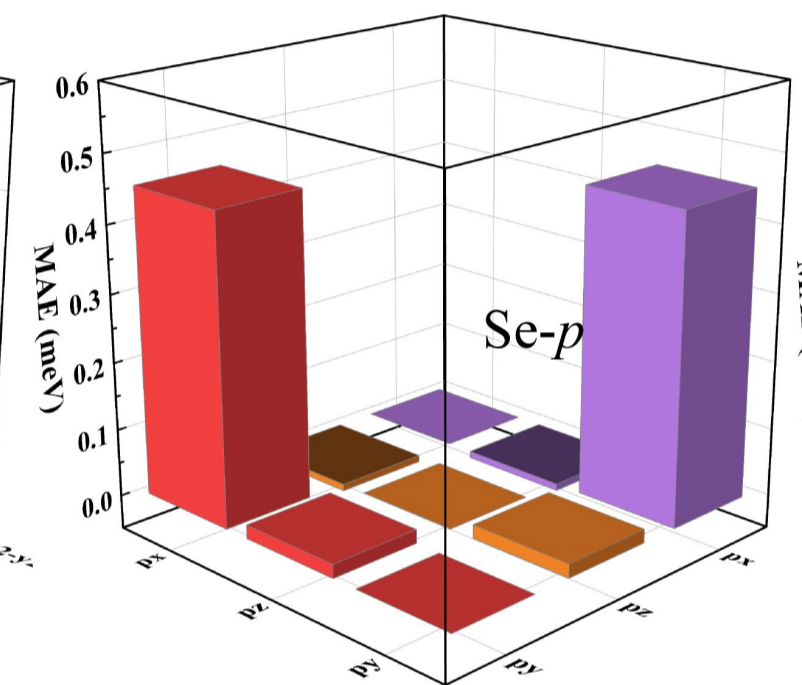

(d) -0.5%

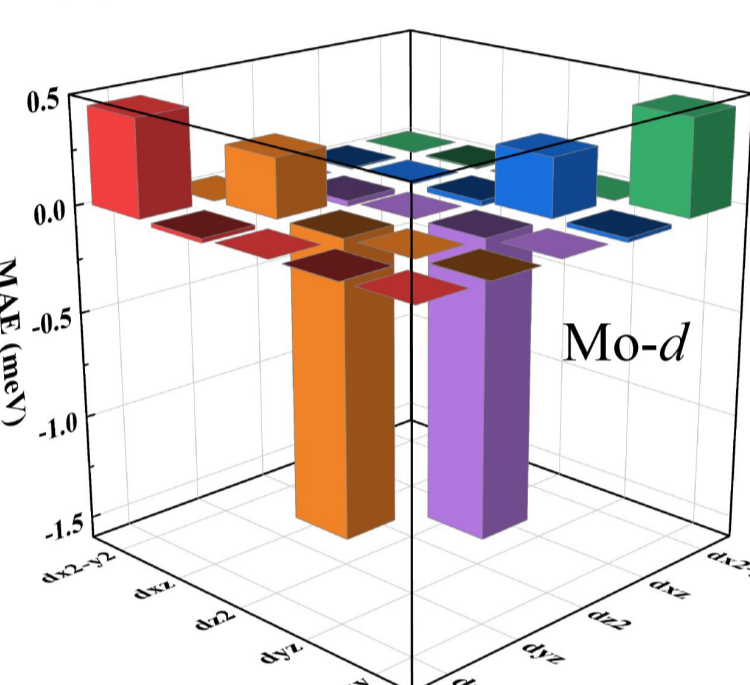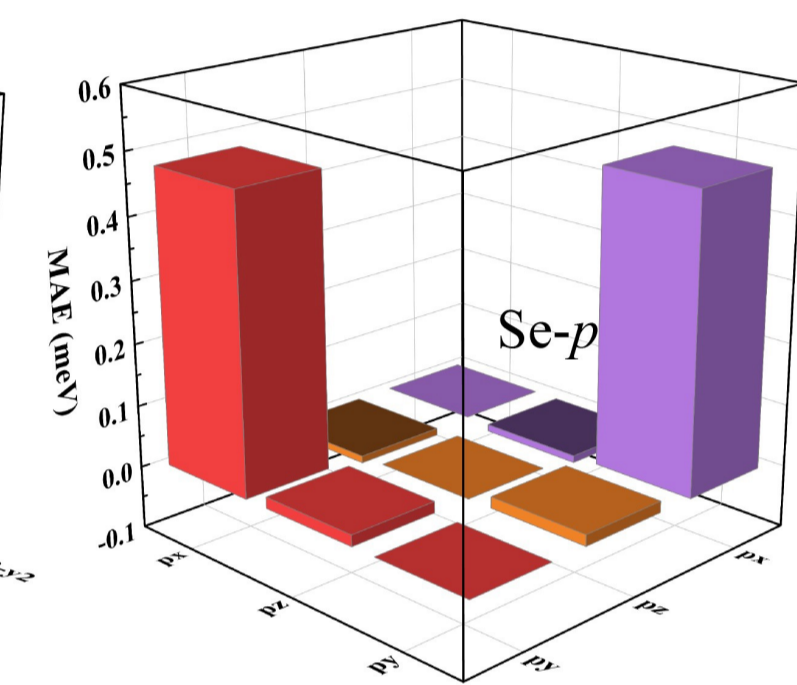

(e) 0.5%

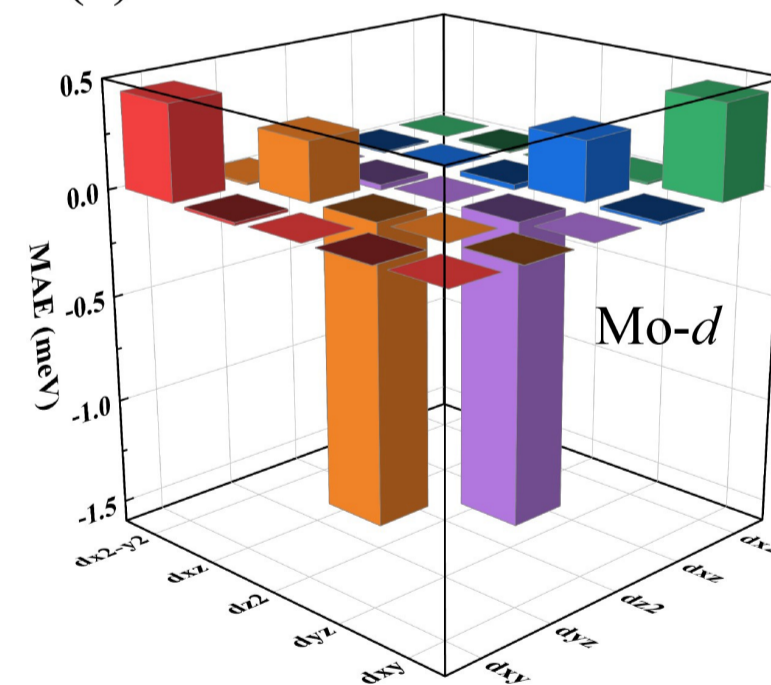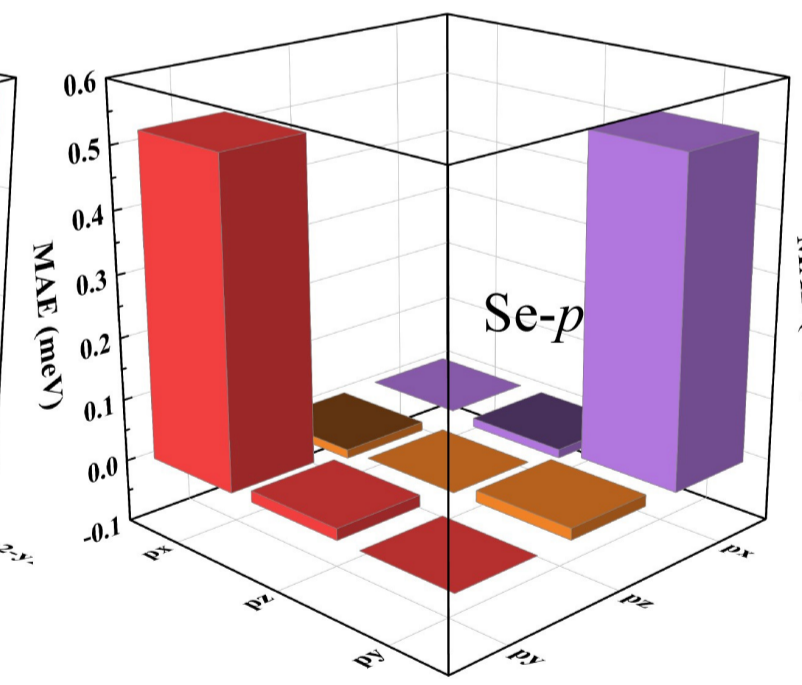

(f) 1.0%

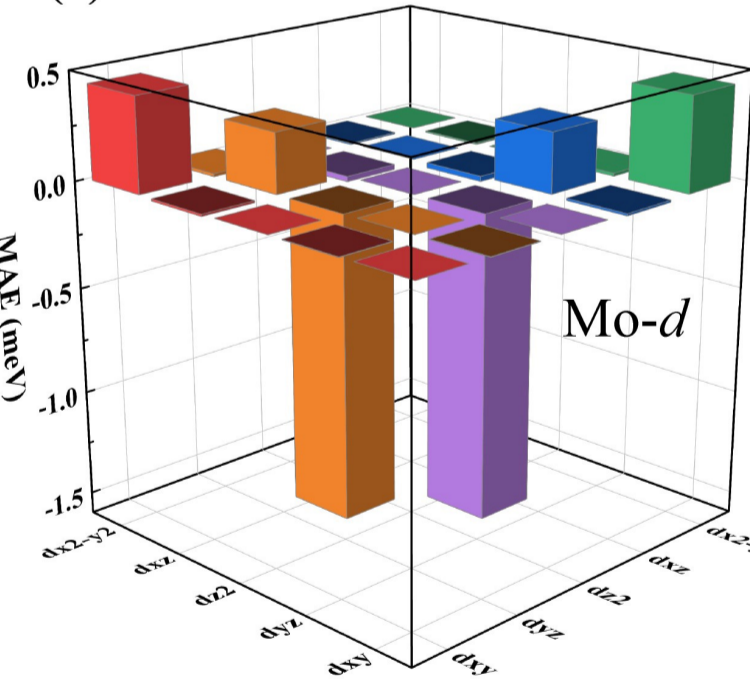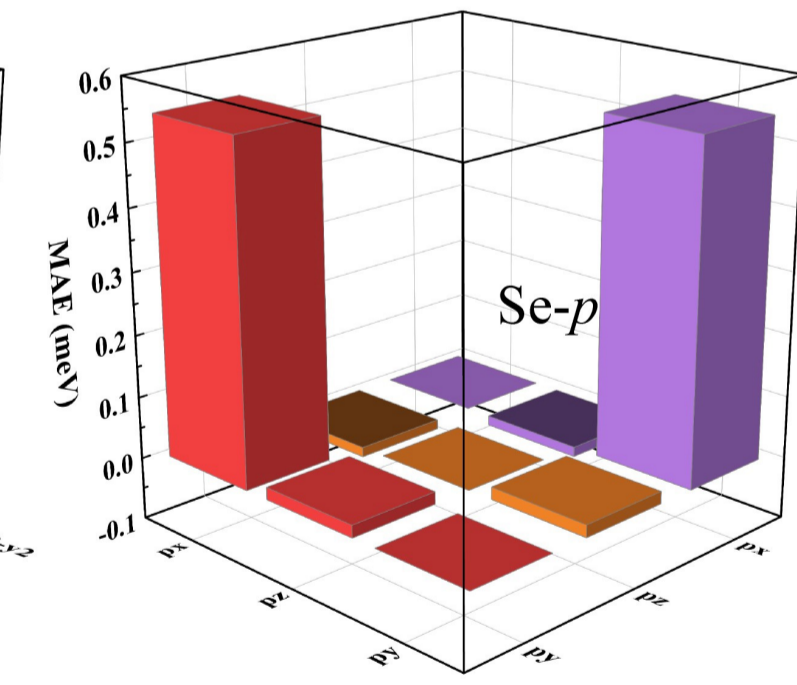

(g) 1.5%

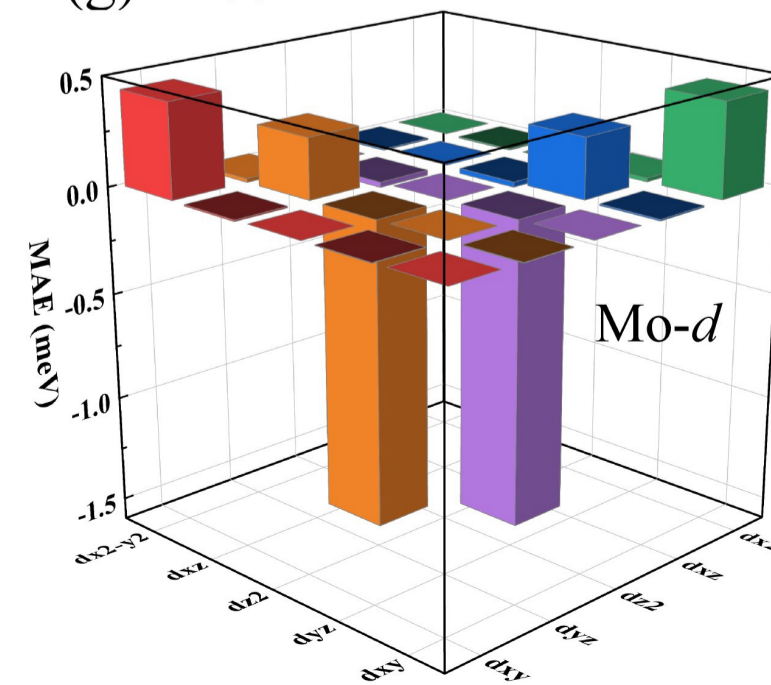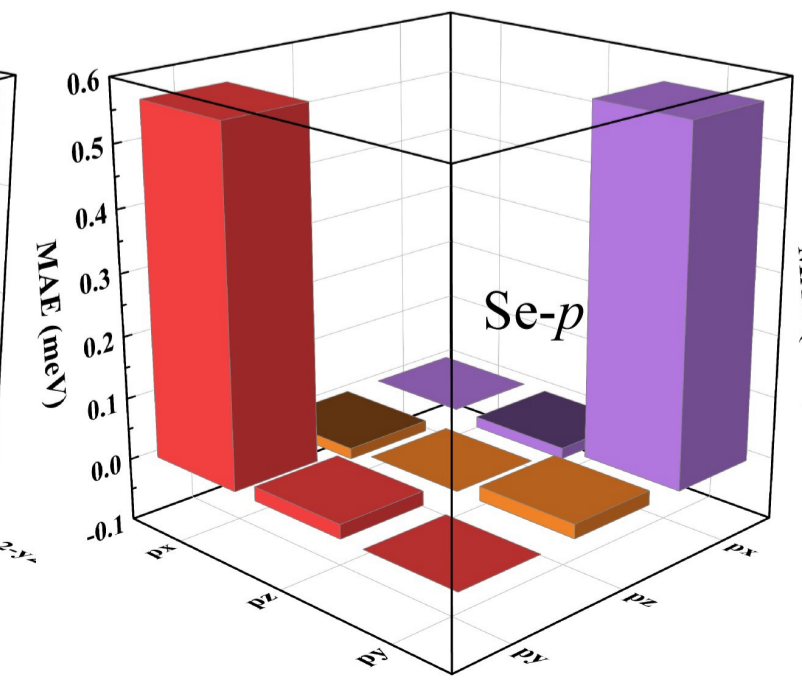

(h) 2.0%

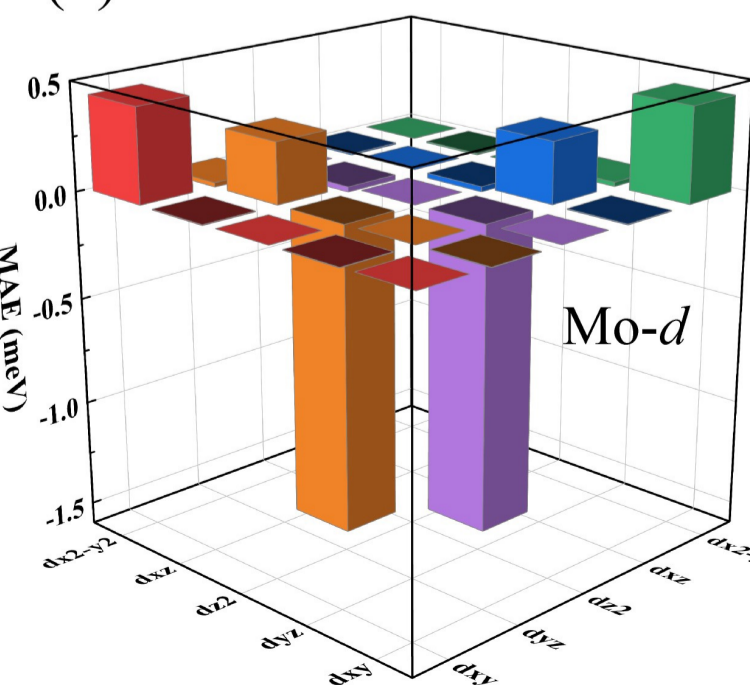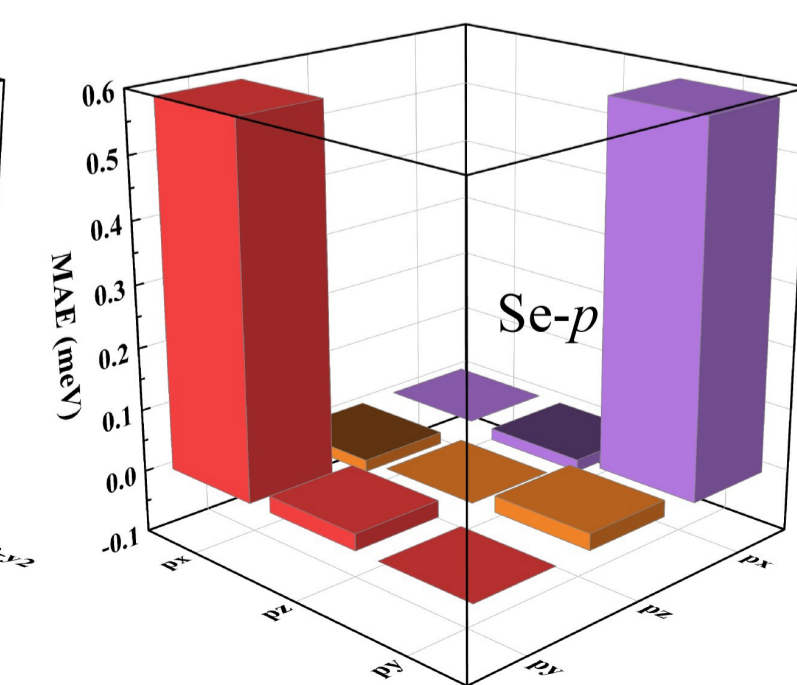

Supplement: d3cp03762b9.pdf [file d3cp03762b9.pdf]
